# Supplementary material
Source: PubMed Central journal article supplement (PMC10062167)
Supplement: jvi.00190-23-s0001.pdf [file jvi.00190-23-s0001.pdf]

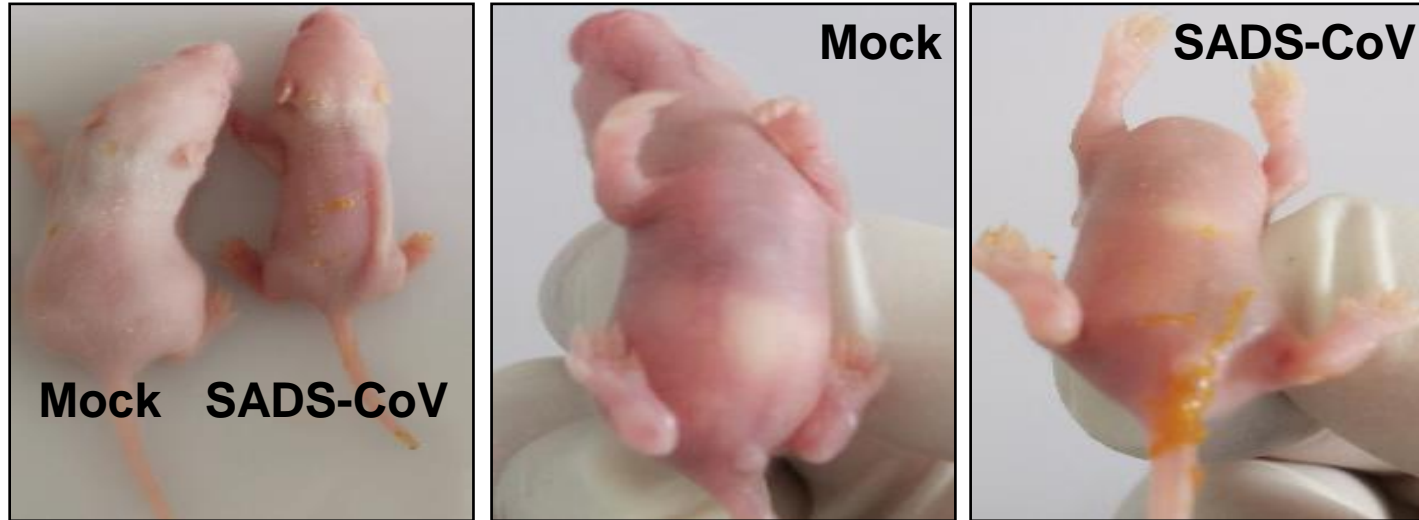

**Figure S1.** Neonatal mice of 7 days old were infected with SADS-CoV via intracerebral route. The infected mice developed serious symptoms including weight loss and watery diarrhea.
